# Supplementary material for: Stable Expression of dmiR-283 in the Brain Promises Positive Effects in Endurance Exercise on Sleep–Wake Behavior in Aging Drosophila
Source: MDPI journal article supplement (doi:10.3390/ijms24044180), 2023-02-20
Supplement: s1 [file s1]

**Table S2.** CircaCompare analysis of sleep–wake rhythm of *Drosophila* with dmiR-283 knockout and overexpression.

|                         | Sleep time / h |                    |           |         | Rest time / h |                    |           |         | Number of activities / h |                    |           |         |
|-------------------------|----------------|--------------------|-----------|---------|---------------|--------------------|-----------|---------|--------------------------|--------------------|-----------|---------|
|                         | JTK.PER        | mesor <sup>a</sup> | amplitude | phase   | JTK.PER       | mesor <sup>a</sup> | amplitude | phase   | JTK.PER                  | mesor <sup>a</sup> | amplitude | phase   |
| <i>w<sup>1118</sup></i> | 12             | 18.27              | 14.72     | 6.12    | 12            | 7.45               | 1.47      | 11.05   | 12                       | 74.83              | 30.43     | 0.44    |
| mir-283 <sup>OE/+</sup> | 12             | 30.01***           | 21.65**   | 7.32*** | 12            | 8.09               | 5.68***   | 1.48*** | 12                       | 39.59***           | 29.48     | 1.22*** |
| mir-283 <sup>KO/+</sup> | 12             | 14.08 <sup>#</sup> | 12.60     | 6.50    | 24            | 8.19               | 0.90      | 0.09    | 12                       | 75.68              | 27.58     | 0.82    |

Note: <sup>a</sup> denotes circadian-adjusted mean. \* indicates the difference between overexpression group and control group; <sup>#</sup> indicates the difference between knockout group and control group. \*, <sup>#</sup>, and <sup>&</sup> *p*<0.05; \*\*, <sup>##</sup>, and <sup>&&</sup> *p*<0.01; \*\*\*, <sup>###</sup>, and <sup>&&&</sup> *p*<0.001.
