# Supplementary material for: Stable Expression of dmiR-283 in the Brain Promises Positive Effects in Endurance Exercise on Sleep–Wake Behavior in Aging Drosophila
Source: MDPI journal article supplement (doi:10.3390/ijms24044180), 2023-02-20
Supplement: s1 [file s1]

**Table S3.** CircaCompare analysis of the effects of LNvs-specific knockdown of dmiR-283 and endurance exercise intervention on sleep–wake rhythms in aging *Drosophila*.

|                                           | Sleep time / h |                    |                       |       | Rest time / h |                    |           |       | Number of activities / h |                    |                     |       |
|-------------------------------------------|----------------|--------------------|-----------------------|-------|---------------|--------------------|-----------|-------|--------------------------|--------------------|---------------------|-------|
|                                           | JTK.PER        | mesor <sup>a</sup> | amplitude             | phase | JTK.PER       | mesor <sup>a</sup> | amplitude | phase | JTK.PER                  | mesor <sup>a</sup> | amplitude           | phase |
| mir-283 <sup>SP</sup> /+ _10d             | 12 h           | 24.88              | 17.14                 | 6.78  | 12 h          | 10.74              | 4.47      | 0.96  | 12 h                     | 40.62              | 22.25               | 0.77  |
| mir-283 <sup>SP</sup> /+ _30d_C           | 22 h           | 20.86              | 7.29                  | 7.77  | 24 h          | 10.25              | 0.64      | 3.35  | 12 h                     | 45.81              | 12.89               | 1.62  |
| mir-283 <sup>SP</sup> /+ _30d_E           | 12 h           | 32.18***           | 13.80*                | 7.91  | 23 h          | 8.56*              | 3.53*     | 2.40  | 12 h                     | 30.25***           | 17.37*              | 1.69  |
| mir-283 <sup>SP</sup> /+ _50d_C           | 23 h           | 27.58              | 8.48                  | 7.91  | 24 h          | 11.01              | 1.79      | 2.51  | 23 h                     | 35.28              | 10.66               | 1.57  |
| mir-283 <sup>SP</sup> /+ _50d_E           | 22 h           | 22.18              | 8.21                  | 8.51  | 24 h          | 13.46*             | 2.05      | 3.53  | 12 h                     | 37.23              | 10.48               | 2.03  |
| <i>Pdf</i> > mir-283 <sup>SP</sup> _10d   | 12 h           | 43.35###           | 10.39 <sup>#</sup>    | 7.28  | 23 h          | 5.34###            | 3.36      | 1.26  | 12 h                     | 19.24###           | 12.02 <sup>##</sup> | 1.37  |
| <i>Pdf</i> > mir-283 <sup>SP</sup> _30d_C | 23 h           | 49.53###           | 6.14                  | 7.95  | 23 h          | 4.06###            | 2.09      | 2.15  | 12 h                     | 9.51###            | 6.29 <sup>##</sup>  | 1.73  |
| <i>Pdf</i> > mir-283 <sup>SP</sup> _30d_E | 23 h           | 52.35*             | 3.58                  | 8.66  | 23 h          | 2.72*              | 1.31      | 2.76  | 23 h                     | 8.36               | 3.79                | 2.39  |
| <i>Pdf</i> > mir-283 <sup>SP</sup> _50d_C | 23 h           | 53.32###           | 1.98 <sup>&amp;</sup> | 8.46  | 23 h          | 2.56###            | 0.73      | 2.56  | 23 h                     | 10.33###           | 1.85 <sup>##</sup>  | 2.21  |
| <i>Pdf</i> > mir-283 <sup>SP</sup> _50d_E | 22 h           | 50.81*             | 2.52                  | 8.88  | 23 h          | 3.74**             | 1.11      | 3.32  | 22 h                     | 10.59              | 2.54                | 2.50  |

Note: <sup>a</sup> denotes circadian rhythm-adjusted mean. <sup>#</sup> indicates LNvs-specific knockdown of dmiR-283 flies compared with age-matched control flies; \* indicates non-exercise group from the same genetic background compared with the exercise group. \*, <sup>#</sup>, and <sup>&</sup>  $p < 0.05$ , \*\*, <sup>##</sup>, and <sup>&&</sup>  $p < 0.01$ , \*\*\*, <sup>###</sup>, and <sup>&&&</sup>  $p < 0.001$ .
