# Supplementary material for: Stable Expression of dmiR-283 in the Brain Promises Positive Effects in Endurance Exercise on Sleep–Wake Behavior in Aging Drosophila
Source: MDPI journal article supplement (doi:10.3390/ijms24044180), 2023-02-20
Supplement: s1 [file s1]

**Table S1.** CircaCompare analysis of sleep–wake rhythms in young, middle-aged and old *Drosophila*.

| Sleep time / h |         |                    |           |       | Rest time / h |                    |           |       | Number of activities / h |                    |           |       |
|----------------|---------|--------------------|-----------|-------|---------------|--------------------|-----------|-------|--------------------------|--------------------|-----------|-------|
|                | JTK.PER | mesor <sup>a</sup> | amplitude | phase | JTK.PER       | mesor <sup>a</sup> | amplitude | phase | JTK.PER                  | mesor <sup>a</sup> | amplitude | phase |
| 10d            | 12 h    | 19.28              | 14.11     | 6.09  | 12 h          | 7.64               | 1.57      | 11.08 | 12 h                     | 72.03              | 28.66     | 0.43  |
| 30d            | 24 h    | 20.22              | 5.37**    | 6.79  | 24 h          | 8.16               | 0.79      | 0.24  | 24 h                     | 60.99***           | 11.73***  | 1.13  |
| 50d            | 24 h    | 36.25###&&&        | 2.08&&&   | 8.09  | 24 h          | 9.27               | 0.69      | 2.93  | 24 h                     | 26.82###&&&        | 2.28#&&&  | 1.82  |

Note: <sup>a</sup> denotes circadian-adjusted mean. \* indicates the difference between 30d and 10d; # indicates the difference between 50d and 30d; & indicates the difference between 50d and 10d. \*, #, and & *p*<0.05; \*\*, ##, and && *p*<0.01; \*\*\*, ###, and &&& *p*<0.001.
